# Supplementary material for: Genomic variants link to hepatitis C racial disparities
Source: PubMed Central journal article supplement (PMC5601746; doi:10.18632/oncotarget.19755), 2017-08-01
Supplement: oncotarget-08-59455-s001.pdf [file oncotarget-08-59455-s001.pdf]

# Genomic variants link to hepatitis C racial disparities

## SUPPLEMENTARY MATERIALS

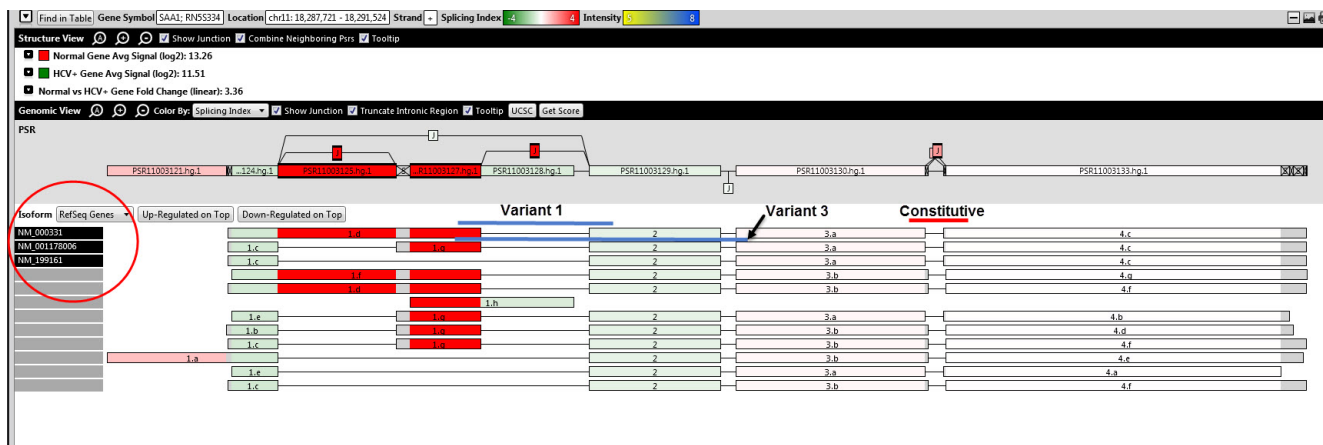

**Supplementary Figure 1: Genomic view of primer design for *SAA1* alternative splicing qRT-PCR validation.** Gene structure view of *SAA1* from TAC 2.0 software (to scale) and approximate positions of qRT-PCR amplicons (not to scale) are shown. The positions of primer sets in Supplementary Table 1 (constitutive C and alt-spliced A) are shown. Splicing Index (SI) from qPCR data is calculated for alt-spliced amplicons by normalizing their fold change to the average fold change of constitutive amplicons. Splice Indices = 9.12 and 3.21 for CA and AA, respectively. In effect, SI is a fold-change measure of the alt-spliced event.

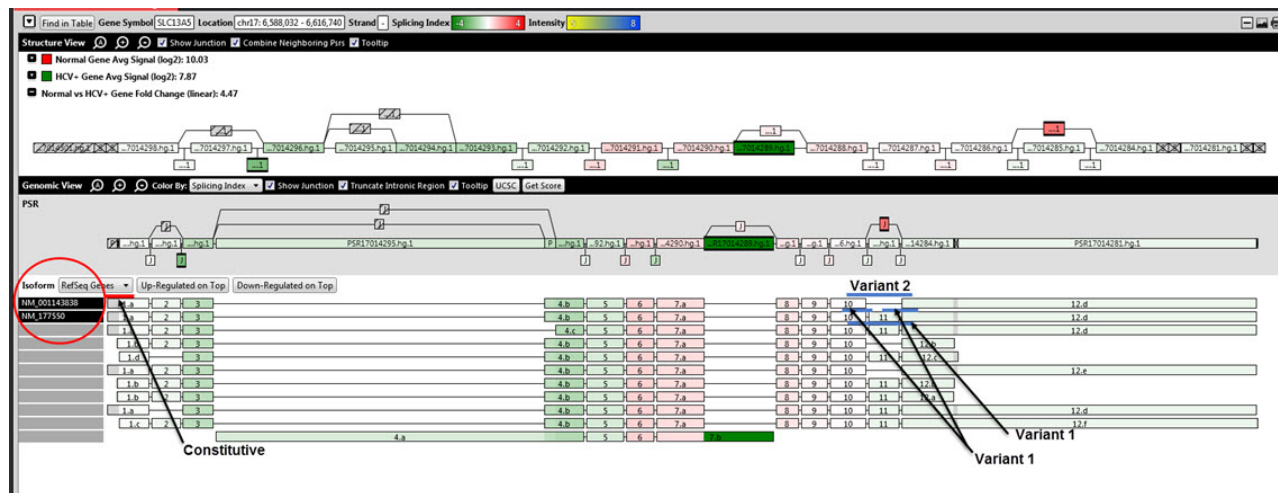

**Supplementary Figure 2: Genomic view of primer design for *SLC13A5* alternative splicing qRT-PCR validation.** Gene structure view of *SLC13A5* from TAC 2.0 software (to scale) and approximate positions of qRT-PCR amplicons (not to scale) are shown. Splicing Index (SI) from qPCR data is calculated for alt-spliced amplicons by normalizing their fold change to the average fold change of constitutive amplicons. Splice Indices = -1.61 and -1.12 for CA and AA, respectively.

Supplementary Table 1: PCR primer sequences

| Name*             | Amplicon binding site | Exon            | Forward (5'-3')                    | Reverse (5'-3')                     | Annealing temp. (°C) |
|-------------------|-----------------------|-----------------|------------------------------------|-------------------------------------|----------------------|
| SAA1cons          | 409 to 640            | 3 to 4          | AGTGATCAGCG<br>ATGCCAGAG           | CCATTGTGTA<br>CCCTCTCCCC            | 60                   |
| SAA1v1as          | 29 to 257             | 1               | CAGATCAGGT<br>GAGGAGCACAC          | ACGAAAAGAA<br>GCTTCGGCTG            | 60                   |
| SAA1v3as          | 19 to 118             | 1 to 3          | GCTACAGCACAGA<br>TCAGTTATCC        | CCCGTGAGAA<br>GCTTCAITGGT           | 60                   |
| AOX1cons          | 3042 to 3145          | 26              | ATGGCCATGTCTT<br>CCTACTCC          | GGAAACTTCA<br>GGGGGACCAT            | 60                   |
| AOX1ex4.5as       | 309 to 427            | 4 to 5          | CCAGCCAATG<br>CCTGTCTGAT           | CACTTGGAAT<br>CCTCTCCTGAA           | 60                   |
| AOX1ex12.13as     | 1167 to 1236          | 12 to 13        | GGGGGACACAT<br>CATTAGCAGG          | GGGTACAGTTA<br>CCCACAGCC            | 60                   |
| SLC13A5cons       | 14 to 119             | 1               | TGTGGCCCTT<br>CTTAAGCCC            | ACTTGAGACA<br>TAGCTCAGCG            | 60                   |
| SLC13A5v1as       | 1518 to 1645          | 10 to 11        | CCTCCATGTC<br>TCGCTCCATC           | GTGCCCATAG<br>GTGAACACGA            | 60                   |
| SLC13A5v2as       | 1423 to 1536          | 10 to 11        | GGCAGCCATCA<br>CCTTGATCT           | CCTGTTTTCA<br>CCATGGAGGC            | 60                   |
| SNORD82cons       | 4 to 75               | 1               | GCACAAATGATGAA<br>TAACAAAGGGA      | ACAGCACATCA<br>GCACACTACA           | 60                   |
| PCNA-AS1cons      | 266 to 357            | 1               | TAGCTGGTTTCG<br>GCTTCAGG           | CGTAGCAGAG<br>TGGTCGTTGT            | 60                   |
| IFI30cons         | 363 to 457            | 2 to 4          | TACGGAAACG<br>CACAGGAACA           | CAGGCCTCCA<br>CCTTGTTGAA            | 60                   |
| DBA2cons          | 418 to 519            | 1 to 2          | CAATAGCTAGCC<br>GGTGTCTGT          | GGCAGCAAAC<br>CTCAGTACCA            | 60                   |
| ROBO1cons         | 112 to 304            | 1 to 3          | TCTGCACTAC<br>GGAGCCTCT            | TTCAGGGTCTGG<br>AATAAGCTGG          | 60                   |
| <b>ACTINalpha</b> | <b>1652 to 1768</b>   | <b>12 to 13</b> | <b>CAGGACCGTGT<br/>GGAGCAGATTG</b> | <b>CAGATTGTCCC<br/>ACTGGTCACAG</b>  | <b>60</b>            |
| <b>B2M</b>        | <b>348 to 426</b>     | <b>2 to 3</b>   | <b>TGAGTATGCCT<br/>GCCGTGTGAAC</b> | <b>TGCTGCTTACAT<br/>GTCTCGATCCC</b> | <b>60</b>            |
| <b>GAPDH</b>      | <b>1091 to 1239</b>   | <b>8 to 9</b>   | <b>TGCCCTCAAC<br/>GACCACTTTG</b>   | <b>CTCTTCCTCTTG<br/>TGCTCTTGCTG</b> | <b>60</b>            |

**Bold = Reference genes.**

cons = constitutive.

v1-v3 = variant 1-3.

as = alternative splicing.

Supplementary Table 2: Clinical characteristics of the study cohort

| Variables                    | Caucasian American (CA) |            |              | African American (AA) |              |              |
|------------------------------|-------------------------|------------|--------------|-----------------------|--------------|--------------|
|                              | Normal (HCV-)           | HCV+ (CIR) | HCV+/HCC     | Normal (HCV-)         | HCV+ (CIR)   | HCV+/HCC     |
| Age, years, mean (range)     | 48.5 (38-64)            | 51 (32-61) | 55.3 (48-67) | 42.3 (38-50)          | 48.3 (33-62) | 59.3 (56-66) |
| Male sex, n (%)              | 4 (67)                  | 4 (57)     | 5 (83)       | 3 (100)               | 3 (67)       | 3 (67)       |
| Laboratory values, mean (SD) |                         |            |              |                       |              |              |
| ALBUMIN(g/dL)                | NA                      | 3.1(0.7)   | 2.77(0.3)    | NA                    | 2.6(0.5)     | 1.6(0.6)     |
| AST(U/L)                     | NA                      | 47(14.4)   | 91(104)      | NA                    | 75.6(94)     | 88(10)       |
| ALT(U/L)                     | NA                      | 27(1.5)    | 64(86.3)     | NA                    | 51(5.4)      | 66 (4.6)     |
| BIL-T(mg/dL)                 | NA                      | 4(1.7)     | 2.1(1.1)     | NA                    | 5.3(3.1)     | 2.2(0.8)     |
| HEMOGLOBIN                   | NA                      | 9.1(1.8)   | 13.9(1.7)    | NA                    | 9.3(2.1)     | 12(1.8)      |

**CIR= Cirrhotic; HCV+/HCC = HCV-associated Hepatocellular carcinoma.**

HCV genotype =Ia.
